# Supplementary material
Source: PubMed Central journal article supplement (PMC5630454)
Supplement: NIHMS905590-supplement-2.pdf [file NIHMS905590-supplement-2.pdf]

# Supporting Information

**Table S1. Primers used in this study**

| Name                 | Sequence (5' end to 3' end)                                                                   |
|----------------------|-----------------------------------------------------------------------------------------------|
| ITEP <sub>A</sub> -F | CGTGCTGCCGGGTGTTGGCGGTGTGTTACCAGGCGTCGGGGGTGTGC<br>TGCCGGGCGTTGGTGGTGTCTTGCCCTGGCGTAGGAGG     |
| ITEP <sub>A</sub> -R | TCCTACGCCAGGCAAGACACCACCAACGCCCGGCAGCACACCCCGA<br>CGCCTGGTAACACACCGCCAACACCCGGCAGCACGCC       |
| ITEP <sub>B</sub> -F | CGCGGGTGTGCCGGGCGGCGCCGGTGTTCAGGGGGCGCGGGTGTG<br>CCGGGAGGCGCAGGTGTCCCTGGGGGCGCTGGTGTACCGGGAGG |
| ITEP <sub>B</sub> -R | TCCCGGTACACCAGCGCCCCAGGGACACCTGCGCCTCCCGGCACAC<br>CCGCGCCCCCTGGAACACCGGCGCCGCCCGGCACACCCGCGCC |
| sMMP-<br>pOVA-F      | GCCTCTGGGTCTGGCAGGTAGCATTATTAACCTTTGAAAACTGTAAGG                                              |
| sMMP-<br>pOVA-R      | TTACAGTTTTTCAAAGTTAATAATGCTACCTGCCAGACCCAGAGGCC                                               |
| pOVA-F               | GGAGAGTATAATCAACTTTGAAAACTGTAAGG                                                              |
| pOVA-R               | TTACAGTTTTTCAAAGTTGATTATACTCTCCCC                                                             |

**Figure S1.**

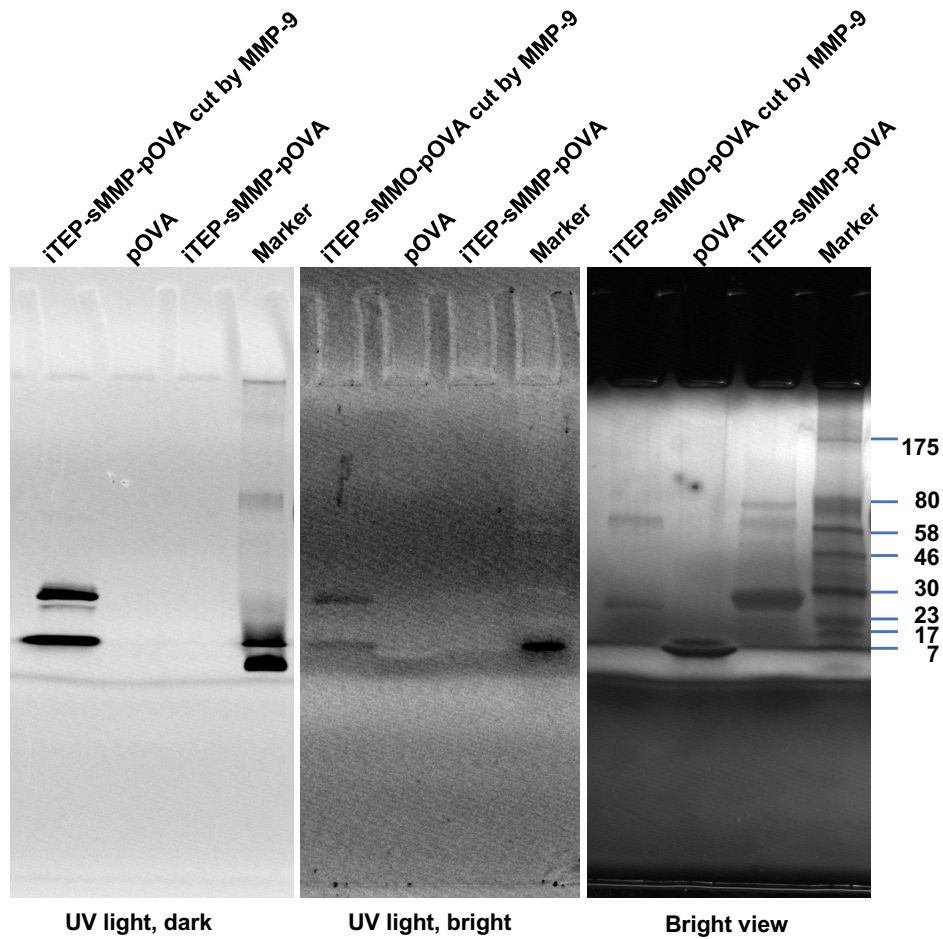

**Figure S1.** The enzyme digestion product of iTEP-sMMP-pOVA by MMP-9 is pOVA. The fluorescein labeled iTEP-sMMP-pOVA ( $2 \mu\text{g}$ ) was digested with MMP-9 and run together with free pOVA ( $80 \mu\text{g}$ ), uncut iTEP-sMMP-pOVA ( $20 \mu\text{g}$ ) on a SDS-PAGE. The picture of the gel was taken under UV light in dark, UV light in bright, and bright view condition.

**Figure S2.**

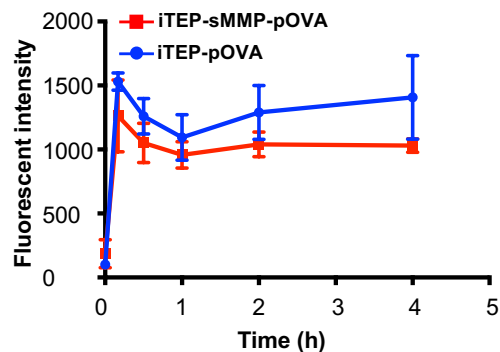

**Figure S2.** Inhibition of cellular uptake of iTEP vaccines by DCs. DC 2.4 cells were incubated with 10  $\mu$ M of fluorescein-labeled iTEP vaccines in FBS free medium at 4  $^{\circ}$ C for extended time. The fluorescent intensity of the cells were plotted with the time extension. The fluorescein-labeled iTEP vaccines bound to the surface of DC cells after 10 min of incubation at 4  $^{\circ}$ C. However, there was no increase of fluorescent intensity when the cells were incubated from 10 min to 4 h at 4  $^{\circ}$ C, indicating that the uptake of iTEP vaccines was inhibited in this situation.

**Figure S3.**

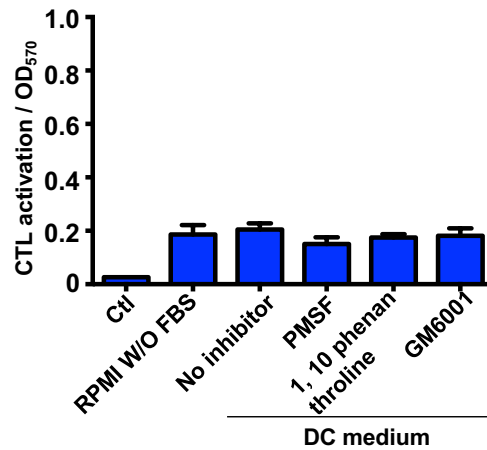

**Figure S3.** MMP inhibitors have no effect on the direct loading of pOVA released from iTEP-pOVA. DC-cultured medium was pretreated with inhibitors such as PMSF (5 mM), 1,10 phenanthroline (20 mM), or GM6001 (0.1 mM) at 37 °C for 2 h. Then iTEP-pOVA was incubated with RPMI medium without FBS, or DC-cultured medium with or without inhibitors at 37 °C for 16 h before loading to DC2.4 cells on ice. After 30 min of ice incubation, the DC2.4 cells were washed, fixed, and then mixed with B3Z cells for B3Z activation.
